# Supplementary material for: Yttrium- and zirconium-decorated Mg12O12–X (X = Y, Zr) nanoclusters as sensors for diazomethane (CH2N2) gas
Source: Royal Society of Chemistry journal article supplement (doi:10.1039/d3ra02939e), 2023-01-01
Supplement: d3ra02939e1.pdf [file d3ra02939e1.pdf]

## Yttrium and zirconium decorated $\text{Mg}_{12}\text{O}_{12}\text{-X}$ ( $\text{X} = \text{Y}, \text{Zr}$ ) nanoclusters as sensors for diazomethane ( $\text{CH}_2\text{N}_2$ ) gas

Terkumbur E. Gber <sup>a,b</sup>, Hitler Louis <sup>a,b,f\*\*</sup>, Obinna C. Ngana<sup>d</sup> Ismail O. Amodu <sup>a,c</sup>, Ernest E. Ekereke <sup>a,c</sup>, Innocent Benjamin <sup>a</sup>, Stephen A. Adalikwu<sup>a</sup> and Adedapo Adeyinka<sup>e</sup>

<sup>a</sup>Computational and Bio-Simulation Research Group, University of Calabar, Calabar, Nigeria

<sup>b</sup>Department of Pure and Applied Chemistry, Faculty of Physical Sciences, University of Calabar, Calabar, Nigeria

<sup>c</sup>Department of Mathematics, Faculty of Physical Sciences, University of Calabar, Calabar, Nigeria

<sup>d</sup>Department of Chemical Sciences, Federal University of Wukari, Wukari. Taraba State

<sup>e</sup>Department of Chemical Sciences, University of Johannesburg, South-Africa

<sup>f</sup>Faculty of Allied Health Sciences, Chettinad Hospital and Research institute, Chettinad Academy or Research and Education, Kelambakkam 603103, Tamil Nadu, India.

\*Corresponding authors' email: [louismuzong@gmail.com](mailto:louismuzong@gmail.com)

Electronic supporting information

**Table S1:** Optimized Parameters of the studied systems bond length and angles for the interacted systems. (Angstroms and Degrees)

### CH<sub>2</sub>N<sub>2</sub>@MgO

| ! Name | Definition | Value  | Derivative Info. | ! |
|--------|------------|--------|------------------|---|
| ! R1   | R(1,13)    | 1.8896 | -DE/DX = 0.0     | ! |
| ! R2   | R(1,15)    | 1.9487 | -DE/DX = 0.0     | ! |
| ! R3   | R(1,16)    | 1.95   | -DE/DX = 0.0     | ! |
| ! R4   | R(2,13)    | 1.9482 | -DE/DX = 0.0     | ! |
| ! R5   | R(2,14)    | 1.8914 | -DE/DX = 0.0     | ! |
| ! R6   | R(2,24)    | 1.9484 | -DE/DX = 0.0     | ! |
| ! R7   | R(3,13)    | 1.9486 | -DE/DX = 0.0     | ! |

|       |          |        |              |   |
|-------|----------|--------|--------------|---|
| ! R8  | R(3,23)  | 1.8904 | -DE/DX = 0.0 | ! |
| ! R9  | R(3,24)  | 1.9496 | -DE/DX = 0.0 | ! |
| ! R10 | R(4,15)  | 1.8896 | -DE/DX = 0.0 | ! |
| ! R11 | R(4,19)  | 1.9506 | -DE/DX = 0.0 | ! |
| ! R12 | R(4,23)  | 1.9474 | -DE/DX = 0.0 | ! |
| ! R13 | R(5,14)  | 1.9467 | -DE/DX = 0.0 | ! |
| ! R14 | R(5,17)  | 1.9492 | -DE/DX = 0.0 | ! |
| ! R15 | R(5,21)  | 1.8897 | -DE/DX = 0.0 | ! |
| ! R16 | R(6,14)  | 1.9472 | -DE/DX = 0.0 | ! |
| ! R17 | R(6,16)  | 1.8889 | -DE/DX = 0.0 | ! |
| ! R18 | R(6,17)  | 1.9522 | -DE/DX = 0.0 | ! |
| ! R19 | R(7,15)  | 1.946  | -DE/DX = 0.0 | ! |
| ! R20 | R(7,16)  | 1.9477 | -DE/DX = 0.0 | ! |
| ! R21 | R(7,18)  | 1.8923 | -DE/DX = 0.0 | ! |
| ! R22 | R(8,18)  | 1.9431 | -DE/DX = 0.0 | ! |
| ! R23 | R(8,19)  | 1.886  | -DE/DX = 0.0 | ! |
| ! R24 | R(8,20)  | 1.981  | -DE/DX = 0.0 | ! |
| ! R25 | R(9,17)  | 1.8864 | -DE/DX = 0.0 | ! |
| ! R26 | R(9,18)  | 1.9413 | -DE/DX = 0.0 | ! |
| ! R27 | R(9,20)  | 1.9608 | -DE/DX = 0.0 | ! |
| ! R28 | R(10,20) | 1.9063 | -DE/DX = 0.0 | ! |
| ! R29 | R(10,21) | 1.9436 | -DE/DX = 0.0 | ! |
| ! R30 | R(10,22) | 1.9397 | -DE/DX = 0.0 | ! |
| ! R31 | R(11,19) | 1.9486 | -DE/DX = 0.0 | ! |
| ! R32 | R(11,22) | 1.8906 | -DE/DX = 0.0 | ! |
| ! R33 | R(11,23) | 1.9491 | -DE/DX = 0.0 | ! |
| ! R34 | R(12,21) | 1.9513 | -DE/DX = 0.0 | ! |
| ! R35 | R(12,22) | 1.9482 | -DE/DX = 0.0 | ! |
| ! R36 | R(12,24) | 1.8883 | -DE/DX = 0.0 | ! |
| ! R37 | R(13,14) | 3.261  | -DE/DX = 0.0 | ! |

|       |          |        |              |   |
|-------|----------|--------|--------------|---|
| ! R38 | R(13,15) | 3.2546 | -DE/DX = 0.0 | ! |
| ! R39 | R(13,16) | 3.255  | -DE/DX = 0.0 | ! |
| ! R40 | R(13,23) | 3.2607 | -DE/DX = 0.0 | ! |
| ! R41 | R(13,24) | 2.6835 | -DE/DX = 0.0 | ! |
| ! R42 | R(14,16) | 3.2569 | -DE/DX = 0.0 | ! |
| ! R43 | R(14,17) | 2.6862 | -DE/DX = 0.0 | ! |
| ! R44 | R(14,21) | 3.2576 | -DE/DX = 0.0 | ! |
| ! R45 | R(14,24) | 3.2553 | -DE/DX = 0.0 | ! |
| ! R46 | R(15,16) | 2.6835 | -DE/DX = 0.0 | ! |
| ! R47 | R(15,18) | 3.2547 | -DE/DX = 0.0 | ! |
| ! R48 | R(15,19) | 3.2546 | -DE/DX = 0.0 | ! |
| ! R49 | R(15,23) | 3.2601 | -DE/DX = 0.0 | ! |
| ! R50 | R(16,17) | 3.2589 | -DE/DX = 0.0 | ! |
| ! R51 | R(16,18) | 3.2537 | -DE/DX = 0.0 | ! |
| ! R52 | R(17,18) | 3.2393 | -DE/DX = 0.0 | ! |
| ! R53 | R(17,20) | 3.2945 | -DE/DX = 0.0 | ! |
| ! R54 | R(17,21) | 3.2344 | -DE/DX = 0.0 | ! |
| ! R55 | R(18,19) | 3.235  | -DE/DX = 0.0 | ! |
| ! R56 | R(18,20) | 2.702  | -DE/DX = 0.0 | ! |
| ! R57 | R(19,20) | 3.3004 | -DE/DX = 0.0 | ! |
| ! R58 | R(19,22) | 3.2278 | -DE/DX = 0.0 | ! |
| ! R59 | R(19,23) | 2.6846 | -DE/DX = 0.0 | ! |
| ! R60 | R(20,21) | 3.2954 | -DE/DX = 0.0 | ! |
| ! R61 | R(20,22) | 3.3041 | -DE/DX = 0.0 | ! |
| ! R62 | R(20,25) | 2.3306 | -DE/DX = 0.0 | ! |
| ! R63 | R(21,22) | 2.674  | -DE/DX = 0.0 | ! |
| ! R64 | R(21,24) | 3.2599 | -DE/DX = 0.0 | ! |
| ! R65 | R(22,23) | 3.2477 | -DE/DX = 0.0 | ! |
| ! R66 | R(22,24) | 3.2568 | -DE/DX = 0.0 | ! |
| ! R67 | R(23,24) | 3.2606 | -DE/DX = 0.0 | ! |

|       |             |          |              |   |
|-------|-------------|----------|--------------|---|
| ! R68 | R(25,26)    | 1.1377   | -DE/DX = 0.0 | ! |
| ! R69 | R(26,27)    | 1.277    | -DE/DX = 0.0 | ! |
| ! R70 | R(27,28)    | 1.0786   | -DE/DX = 0.0 | ! |
| ! R71 | R(27,29)    | 1.0787   | -DE/DX = 0.0 | ! |
| ! A1  | A(1,13,2)   | 123.3916 | -DE/DX = 0.0 | ! |
| ! A2  | A(1,13,3)   | 123.4384 | -DE/DX = 0.0 | ! |
| ! A3  | A(1,13,14)  | 92.4504  | -DE/DX = 0.0 | ! |
| ! A4  | A(1,13,23)  | 92.4901  | -DE/DX = 0.0 | ! |
| ! A5  | A(1,13,24)  | 138.6372 | -DE/DX = 0.0 | ! |
| ! A6  | A(2,13,3)   | 92.6892  | -DE/DX = 0.0 | ! |
| ! A7  | A(2,13,15)  | 128.2018 | -DE/DX = 0.0 | ! |
| ! A8  | A(2,13,16)  | 91.1994  | -DE/DX = 0.0 | ! |
| ! A9  | A(2,13,23)  | 109.1956 | -DE/DX = 0.0 | ! |
| ! A10 | A(3,13,14)  | 109.0672 | -DE/DX = 0.0 | ! |
| ! A11 | A(3,13,15)  | 91.2633  | -DE/DX = 0.0 | ! |
| ! A12 | A(3,13,16)  | 128.1405 | -DE/DX = 0.0 | ! |
| ! A13 | A(14,13,15) | 99.9811  | -DE/DX = 0.0 | ! |
| ! A14 | A(14,13,23) | 109.5299 | -DE/DX = 0.0 | ! |
| ! A15 | A(15,13,24) | 113.8432 | -DE/DX = 0.0 | ! |
| ! A16 | A(16,13,23) | 100.0193 | -DE/DX = 0.0 | ! |
| ! A17 | A(16,13,24) | 113.7357 | -DE/DX = 0.0 | ! |
| ! A18 | A(2,14,5)   | 123.4432 | -DE/DX = 0.0 | ! |
| ! A19 | A(2,14,6)   | 123.1852 | -DE/DX = 0.0 | ! |
| ! A20 | A(2,14,16)  | 92.1899  | -DE/DX = 0.0 | ! |
| ! A21 | A(2,14,17)  | 138.2759 | -DE/DX = 0.0 | ! |
| ! A22 | A(2,14,21)  | 92.5398  | -DE/DX = 0.0 | ! |
| ! A23 | A(5,14,6)   | 92.6587  | -DE/DX = 0.0 | ! |
| ! A24 | A(5,14,13)  | 128.2051 | -DE/DX = 0.0 | ! |
| ! A25 | A(5,14,16)  | 109.2089 | -DE/DX = 0.0 | ! |
| ! A26 | A(5,14,24)  | 91.2602  | -DE/DX = 0.0 | ! |

|       |             |          |              |   |
|-------|-------------|----------|--------------|---|
| ! A27 | A(6,14,13)  | 91.1699  | -DE/DX = 0.0 | ! |
| ! A28 | A(6,14,21)  | 108.5817 | -DE/DX = 0.0 | ! |
| ! A29 | A(6,14,24)  | 127.9809 | -DE/DX = 0.0 | ! |
| ! A30 | A(13,14,17) | 113.6515 | -DE/DX = 0.0 | ! |
| ! A31 | A(13,14,21) | 99.7935  | -DE/DX = 0.0 | ! |
| ! A32 | A(16,14,21) | 109.009  | -DE/DX = 0.0 | ! |
| ! A33 | A(16,14,24) | 99.8368  | -DE/DX = 0.0 | ! |
| ! A34 | A(17,14,24) | 113.5329 | -DE/DX = 0.0 | ! |
| ! A35 | A(1,15,4)   | 123.398  | -DE/DX = 0.0 | ! |
| ! A36 | A(1,15,7)   | 92.6806  | -DE/DX = 0.0 | ! |
| ! A37 | A(1,15,18)  | 109.0686 | -DE/DX = 0.0 | ! |
| ! A38 | A(1,15,19)  | 128.1302 | -DE/DX = 0.0 | ! |
| ! A39 | A(1,15,23)  | 91.4097  | -DE/DX = 0.0 | ! |
| ! A40 | A(4,15,7)   | 123.2286 | -DE/DX = 0.0 | ! |
| ! A41 | A(4,15,13)  | 92.3206  | -DE/DX = 0.0 | ! |
| ! A42 | A(4,15,16)  | 138.4523 | -DE/DX = 0.0 | ! |
| ! A43 | A(4,15,18)  | 92.1178  | -DE/DX = 0.0 | ! |
| ! A44 | A(7,15,13)  | 109.055  | -DE/DX = 0.0 | ! |
| ! A45 | A(7,15,19)  | 90.9837  | -DE/DX = 0.0 | ! |
| ! A46 | A(7,15,23)  | 128.0827 | -DE/DX = 0.0 | ! |
| ! A47 | A(13,15,18) | 109.188  | -DE/DX = 0.0 | ! |
| ! A48 | A(13,15,19) | 99.8448  | -DE/DX = 0.0 | ! |
| ! A49 | A(16,15,19) | 113.5711 | -DE/DX = 0.0 | ! |
| ! A50 | A(16,15,23) | 113.9056 | -DE/DX = 0.0 | ! |
| ! A51 | A(18,15,23) | 99.643   | -DE/DX = 0.0 | ! |
| ! A52 | A(1,16,6)   | 123.5186 | -DE/DX = 0.0 | ! |
| ! A53 | A(1,16,7)   | 92.5903  | -DE/DX = 0.0 | ! |
| ! A54 | A(1,16,14)  | 91.4512  | -DE/DX = 0.0 | ! |
| ! A55 | A(1,16,17)  | 128.2472 | -DE/DX = 0.0 | ! |
| ! A56 | A(1,16,18)  | 109.0693 | -DE/DX = 0.0 | ! |

|       |             |          |              |   |
|-------|-------------|----------|--------------|---|
| ! A57 | A(6,16,7)   | 123.2558 | -DE/DX = 0.0 | ! |
| ! A58 | A(6,16,13)  | 92.4329  | -DE/DX = 0.0 | ! |
| ! A59 | A(6,16,15)  | 138.5444 | -DE/DX = 0.0 | ! |
| ! A60 | A(6,16,18)  | 92.0924  | -DE/DX = 0.0 | ! |
| ! A61 | A(7,16,13)  | 108.9932 | -DE/DX = 0.0 | ! |
| ! A62 | A(7,16,14)  | 128.1256 | -DE/DX = 0.0 | ! |
| ! A63 | A(7,16,17)  | 91.0903  | -DE/DX = 0.0 | ! |
| ! A64 | A(13,16,17) | 99.9411  | -DE/DX = 0.0 | ! |
| ! A65 | A(13,16,18) | 109.2036 | -DE/DX = 0.0 | ! |
| ! A66 | A(14,16,15) | 113.9524 | -DE/DX = 0.0 | ! |
| ! A67 | A(14,16,18) | 99.6656  | -DE/DX = 0.0 | ! |
| ! A68 | A(15,16,17) | 113.7126 | -DE/DX = 0.0 | ! |
| ! A69 | A(5,17,6)   | 92.4286  | -DE/DX = 0.0 | ! |
| ! A70 | A(5,17,9)   | 123.9652 | -DE/DX = 0.0 | ! |
| ! A71 | A(5,17,16)  | 109.062  | -DE/DX = 0.0 | ! |
| ! A72 | A(5,17,18)  | 128.4124 | -DE/DX = 0.0 | ! |
| ! A73 | A(5,17,20)  | 92.4467  | -DE/DX = 0.0 | ! |
| ! A74 | A(6,17,9)   | 123.6015 | -DE/DX = 0.0 | ! |
| ! A75 | A(6,17,18)  | 91.3548  | -DE/DX = 0.0 | ! |
| ! A76 | A(6,17,20)  | 129.6596 | -DE/DX = 0.0 | ! |
| ! A77 | A(6,17,21)  | 109.2961 | -DE/DX = 0.0 | ! |
| ! A78 | A(9,17,14)  | 139.075  | -DE/DX = 0.0 | ! |
| ! A79 | A(9,17,16)  | 92.6407  | -DE/DX = 0.0 | ! |
| ! A80 | A(9,17,21)  | 92.3519  | -DE/DX = 0.0 | ! |
| ! A81 | A(14,17,18) | 113.8736 | -DE/DX = 0.0 | ! |
| ! A82 | A(14,17,20) | 115.5773 | -DE/DX = 0.0 | ! |
| ! A83 | A(16,17,20) | 101.1564 | -DE/DX = 0.0 | ! |
| ! A84 | A(16,17,21) | 109.532  | -DE/DX = 0.0 | ! |
| ! A85 | A(18,17,21) | 99.6325  | -DE/DX = 0.0 | ! |
| ! A86 | A(7,18,8)   | 123.7929 | -DE/DX = 0.0 | ! |

|        |             |          |              |   |
|--------|-------------|----------|--------------|---|
| ! A87  | A(7,18,9)   | 123.9125 | -DE/DX = 0.0 | ! |
| ! A88  | A(7,18,17)  | 92.7198  | -DE/DX = 0.0 | ! |
| ! A89  | A(7,18,19)  | 92.5812  | -DE/DX = 0.0 | ! |
| ! A90  | A(7,18,20)  | 141.2734 | -DE/DX = 0.0 | ! |
| ! A91  | A(8,18,9)   | 93.3912  | -DE/DX = 0.0 | ! |
| ! A92  | A(8,18,15)  | 91.7932  | -DE/DX = 0.0 | ! |
| ! A93  | A(8,18,16)  | 129.2676 | -DE/DX = 0.0 | ! |
| ! A94  | A(8,18,17)  | 110.1134 | -DE/DX = 0.0 | ! |
| ! A95  | A(9,18,15)  | 129.0101 | -DE/DX = 0.0 | ! |
| ! A96  | A(9,18,16)  | 91.771   | -DE/DX = 0.0 | ! |
| ! A97  | A(9,18,19)  | 109.6425 | -DE/DX = 0.0 | ! |
| ! A98  | A(15,18,17) | 100.2985 | -DE/DX = 0.0 | ! |
| ! A99  | A(15,18,20) | 116.2399 | -DE/DX = 0.0 | ! |
| ! A100 | A(16,18,19) | 100.1991 | -DE/DX = 0.0 | ! |
| ! A101 | A(16,18,20) | 116.1207 | -DE/DX = 0.0 | ! |
| ! A102 | A(17,18,19) | 109.7584 | -DE/DX = 0.0 | ! |
| ! A103 | A(4,19,8)   | 123.8896 | -DE/DX = 0.0 | ! |
| ! A104 | A(4,19,11)  | 92.5169  | -DE/DX = 0.0 | ! |
| ! A105 | A(4,19,18)  | 91.5799  | -DE/DX = 0.0 | ! |
| ! A106 | A(4,19,20)  | 129.8383 | -DE/DX = 0.0 | ! |
| ! A107 | A(4,19,22)  | 109.2641 | -DE/DX = 0.0 | ! |
| ! A108 | A(8,19,11)  | 124.7088 | -DE/DX = 0.0 | ! |
| ! A109 | A(8,19,15)  | 92.872   | -DE/DX = 0.0 | ! |
| ! A110 | A(8,19,22)  | 93.0191  | -DE/DX = 0.0 | ! |
| ! A111 | A(8,19,23)  | 139.8312 | -DE/DX = 0.0 | ! |
| ! A112 | A(11,19,15) | 109.4707 | -DE/DX = 0.0 | ! |
| ! A113 | A(11,19,18) | 129.006  | -DE/DX = 0.0 | ! |
| ! A114 | A(11,19,20) | 92.7812  | -DE/DX = 0.0 | ! |
| ! A115 | A(15,19,20) | 101.233  | -DE/DX = 0.0 | ! |
| ! A116 | A(15,19,22) | 109.6408 | -DE/DX = 0.0 | ! |

|        |             |          |              |   |
|--------|-------------|----------|--------------|---|
| ! A117 | A(18,19,22) | 99.842   | -DE/DX = 0.0 | ! |
| ! A118 | A(18,19,23) | 114.1412 | -DE/DX = 0.0 | ! |
| ! A119 | A(20,19,23) | 115.6889 | -DE/DX = 0.0 | ! |
| ! A120 | A(8,20,9)   | 91.6331  | -DE/DX = 0.0 | ! |
| ! A121 | A(8,20,10)  | 119.9797 | -DE/DX = 0.0 | ! |
| ! A122 | A(8,20,17)  | 107.0188 | -DE/DX = 0.0 | ! |
| ! A123 | A(8,20,21)  | 124.5561 | -DE/DX = 0.0 | ! |
| ! A124 | A(8,20,22)  | 89.0181  | -DE/DX = 0.0 | ! |
| ! A125 | A(8,20,25)  | 92.4917  | -DE/DX = 0.0 | ! |
| ! A126 | A(9,20,10)  | 120.5919 | -DE/DX = 0.0 | ! |
| ! A127 | A(9,20,19)  | 106.6933 | -DE/DX = 0.0 | ! |
| ! A128 | A(9,20,21)  | 89.1865  | -DE/DX = 0.0 | ! |
| ! A129 | A(9,20,22)  | 124.3101 | -DE/DX = 0.0 | ! |
| ! A130 | A(9,20,25)  | 123.341  | -DE/DX = 0.0 | ! |
| ! A131 | A(10,20,17) | 90.2452  | -DE/DX = 0.0 | ! |
| ! A132 | A(10,20,18) | 133.4066 | -DE/DX = 0.0 | ! |
| ! A133 | A(10,20,19) | 89.5639  | -DE/DX = 0.0 | ! |
| ! A134 | A(10,20,25) | 105.3679 | -DE/DX = 0.0 | ! |
| ! A135 | A(17,20,19) | 106.8321 | -DE/DX = 0.0 | ! |
| ! A136 | A(17,20,22) | 97.551   | -DE/DX = 0.0 | ! |
| ! A137 | A(17,20,25) | 144.694  | -DE/DX = 0.0 | ! |
| ! A138 | A(18,20,21) | 110.7205 | -DE/DX = 0.0 | ! |
| ! A139 | A(18,20,22) | 110.4401 | -DE/DX = 0.0 | ! |
| ! A140 | A(18,20,25) | 117.8927 | -DE/DX = 0.0 | ! |
| ! A141 | A(19,20,21) | 97.4424  | -DE/DX = 0.0 | ! |
| ! A142 | A(19,20,25) | 104.7882 | -DE/DX = 0.0 | ! |
| ! A143 | A(21,20,25) | 131.3418 | -DE/DX = 0.0 | ! |
| ! A144 | A(22,20,25) | 112.2455 | -DE/DX = 0.0 | ! |
| ! A145 | A(5,21,10)  | 124.1639 | -DE/DX = 0.0 | ! |
| ! A146 | A(5,21,12)  | 123.0293 | -DE/DX = 0.0 | ! |



|        |             |          |              |   |
|--------|-------------|----------|--------------|---|
| ! A147 | A(5,21,20)  | 93.5482  | -DE/DX = 0.0 | ! |
| ! A148 | A(5,21,22)  | 138.995  | -DE/DX = 0.0 | ! |
| ! A149 | A(5,21,24)  | 92.1761  | -DE/DX = 0.0 | ! |
| ! A150 | A(10,21,12) | 92.7679  | -DE/DX = 0.0 | ! |
| ! A151 | A(10,21,14) | 128.3999 | -DE/DX = 0.0 | ! |
| ! A152 | A(10,21,17) | 91.3758  | -DE/DX = 0.0 | ! |
| ! A153 | A(10,21,24) | 109.1607 | -DE/DX = 0.0 | ! |
| ! A154 | A(12,21,14) | 91.1162  | -DE/DX = 0.0 | ! |
| ! A155 | A(12,21,17) | 128.3565 | -DE/DX = 0.0 | ! |
| ! A156 | A(12,21,20) | 110.3325 | -DE/DX = 0.0 | ! |
| ! A157 | A(14,21,20) | 101.3882 | -DE/DX = 0.0 | ! |
| ! A158 | A(14,21,22) | 113.8718 | -DE/DX = 0.0 | ! |
| ! A159 | A(17,21,22) | 113.941  | -DE/DX = 0.0 | ! |
| ! A160 | A(17,21,24) | 100.1253 | -DE/DX = 0.0 | ! |
| ! A161 | A(20,21,24) | 111.1851 | -DE/DX = 0.0 | ! |
| ! A162 | A(10,22,11) | 123.9906 | -DE/DX = 0.0 | ! |
| ! A163 | A(10,22,12) | 92.9842  | -DE/DX = 0.0 | ! |
| ! A164 | A(10,22,19) | 91.1431  | -DE/DX = 0.0 | ! |
| ! A165 | A(10,22,23) | 128.602  | -DE/DX = 0.0 | ! |
| ! A166 | A(10,22,24) | 109.3925 | -DE/DX = 0.0 | ! |
| ! A167 | A(11,22,12) | 123.6584 | -DE/DX = 0.0 | ! |
| ! A168 | A(11,22,20) | 93.7766  | -DE/DX = 0.0 | ! |
| ! A169 | A(11,22,21) | 139.5985 | -DE/DX = 0.0 | ! |
| ! A170 | A(11,22,24) | 92.7921  | -DE/DX = 0.0 | ! |
| ! A171 | A(12,22,19) | 128.5362 | -DE/DX = 0.0 | ! |
| ! A172 | A(12,22,20) | 110.094  | -DE/DX = 0.0 | ! |
| ! A173 | A(12,22,23) | 91.3892  | -DE/DX = 0.0 | ! |
| ! A174 | A(19,22,21) | 113.926  | -DE/DX = 0.0 | ! |
| ! A175 | A(19,22,24) | 100.2899 | -DE/DX = 0.0 | ! |
| ! A176 | A(20,22,23) | 101.6066 | -DE/DX = 0.0 | ! |

|        |             |          |              |   |
|--------|-------------|----------|--------------|---|
| ! A177 | A(20,22,24) | 111.0428 | -DE/DX = 0.0 | ! |
| ! A178 | A(21,22,23) | 114.2631 | -DE/DX = 0.0 | ! |
| ! A179 | A(3,23,4)   | 123.1125 | -DE/DX = 0.0 | ! |
| ! A180 | A(3,23,11)  | 123.6184 | -DE/DX = 0.0 | ! |
| ! A181 | A(3,23,15)  | 92.1723  | -DE/DX = 0.0 | ! |
| ! A182 | A(3,23,19)  | 137.9923 | -DE/DX = 0.0 | ! |
| ! A183 | A(3,23,22)  | 92.3907  | -DE/DX = 0.0 | ! |
| ! A184 | A(4,23,11)  | 92.6028  | -DE/DX = 0.0 | ! |
| ! A185 | A(4,23,13)  | 91.0661  | -DE/DX = 0.0 | ! |
| ! A186 | A(4,23,22)  | 108.6219 | -DE/DX = 0.0 | ! |
| ! A187 | A(4,23,24)  | 127.8273 | -DE/DX = 0.0 | ! |
| ! A188 | A(11,23,13) | 128.5206 | -DE/DX = 0.0 | ! |
| ! A189 | A(11,23,15) | 109.2514 | -DE/DX = 0.0 | ! |
| ! A190 | A(11,23,24) | 91.5772  | -DE/DX = 0.0 | ! |
| ! A191 | A(13,23,19) | 113.4511 | -DE/DX = 0.0 | ! |
| ! A192 | A(13,23,22) | 99.79    | -DE/DX = 0.0 | ! |
| ! A193 | A(15,23,22) | 109.0112 | -DE/DX = 0.0 | ! |
| ! A194 | A(15,23,24) | 99.733   | -DE/DX = 0.0 | ! |
| ! A195 | A(19,23,24) | 113.3602 | -DE/DX = 0.0 | ! |
| ! A196 | A(2,24,3)   | 92.651   | -DE/DX = 0.0 | ! |
| ! A197 | A(2,24,12)  | 123.5045 | -DE/DX = 0.0 | ! |
| ! A198 | A(2,24,21)  | 91.4061  | -DE/DX = 0.0 | ! |
| ! A199 | A(2,24,22)  | 128.02   | -DE/DX = 0.0 | ! |
| ! A200 | A(2,24,23)  | 109.1922 | -DE/DX = 0.0 | ! |
| ! A201 | A(3,24,12)  | 123.0806 | -DE/DX = 0.0 | ! |
| ! A202 | A(3,24,14)  | 109.2484 | -DE/DX = 0.0 | ! |
| ! A203 | A(3,24,21)  | 127.8421 | -DE/DX = 0.0 | ! |
| ! A204 | A(3,24,22)  | 91.0181  | -DE/DX = 0.0 | ! |
| ! A205 | A(12,24,13) | 138.3684 | -DE/DX = 0.0 | ! |
| ! A206 | A(12,24,14) | 92.3485  | -DE/DX = 0.0 | ! |

|        |             |          |              |   |
|--------|-------------|----------|--------------|---|
| ! A207 | A(12,24,23) | 92.1036  | -DE/DX = 0.0 | ! |
| ! A208 | A(13,24,21) | 113.6968 | -DE/DX = 0.0 | ! |
| ! A209 | A(13,24,22) | 113.5138 | -DE/DX = 0.0 | ! |
| ! A210 | A(14,24,22) | 99.7985  | -DE/DX = 0.0 | ! |
| ! A211 | A(14,24,23) | 109.6727 | -DE/DX = 0.0 | ! |
| ! A212 | A(21,24,23) | 99.6835  | -DE/DX = 0.0 | ! |
| ! A213 | A(20,25,26) | 115.1267 | -DE/DX = 0.0 | ! |
| ! A214 | A(25,26,27) | 179.3525 | -DE/DX = 0.0 | ! |
| ! A215 | A(26,27,28) | 117.8977 | -DE/DX = 0.0 | ! |
| ! A216 | A(26,27,29) | 117.3763 | -DE/DX = 0.0 | ! |
| ! A217 | A(28,27,29) | 124.7202 | -DE/DX = 0.0 | ! |

---

**Table S2:** Optimized Parameters of the studied systems bond length and angles. (Angstroms and Degrees)

**CH2N2@YMgO**

| ! Name | Definition | Value  | Derivative Info. | ! |
|--------|------------|--------|------------------|---|
| -----  |            |        |                  |   |
| ! R1   | R(1,13)    | 1.8847 | -DE/DX = 0.0     | ! |
| ! R2   | R(1,15)    | 1.9353 | -DE/DX = 0.0     | ! |
| ! R3   | R(1,16)    | 1.9475 | -DE/DX = 0.0     | ! |
| ! R4   | R(2,13)    | 1.9477 | -DE/DX = 0.0     | ! |
| ! R5   | R(2,14)    | 1.8915 | -DE/DX = 0.0     | ! |
| ! R6   | R(2,24)    | 1.9452 | -DE/DX = 0.0     | ! |
| ! R7   | R(3,13)    | 1.9443 | -DE/DX = 0.0     | ! |
| ! R8   | R(3,23)    | 1.8779 | -DE/DX = 0.0     | ! |
| ! R9   | R(3,24)    | 1.9514 | -DE/DX = 0.0     | ! |
| ! R10  | R(4,15)    | 2.0084 | -DE/DX = 0.0     | ! |
| ! R11  | R(4,19)    | 2.0474 | -DE/DX = 0.0     | ! |
| ! R12  | R(4,25)    | 2.1401 | -DE/DX = 0.0     | ! |

|       |          |        |              |   |
|-------|----------|--------|--------------|---|
| ! R13 | R(5,14)  | 1.9496 | -DE/DX = 0.0 | ! |
| ! R14 | R(5,17)  | 1.9484 | -DE/DX = 0.0 | ! |
| ! R15 | R(5,21)  | 1.8884 | -DE/DX = 0.0 | ! |
| ! R16 | R(6,14)  | 1.9475 | -DE/DX = 0.0 | ! |
| ! R17 | R(6,16)  | 1.886  | -DE/DX = 0.0 | ! |
| ! R18 | R(6,17)  | 1.9471 | -DE/DX = 0.0 | ! |
| ! R19 | R(7,15)  | 1.9365 | -DE/DX = 0.0 | ! |
| ! R20 | R(7,16)  | 1.9498 | -DE/DX = 0.0 | ! |
| ! R21 | R(7,18)  | 1.8848 | -DE/DX = 0.0 | ! |
| ! R22 | R(8,18)  | 1.9454 | -DE/DX = 0.0 | ! |
| ! R23 | R(8,19)  | 1.8748 | -DE/DX = 0.0 | ! |
| ! R24 | R(8,20)  | 1.954  | -DE/DX = 0.0 | ! |
| ! R25 | R(9,17)  | 1.8922 | -DE/DX = 0.0 | ! |
| ! R26 | R(9,18)  | 1.947  | -DE/DX = 0.0 | ! |
| ! R27 | R(9,20)  | 1.9447 | -DE/DX = 0.0 | ! |
| ! R28 | R(10,20) | 1.8879 | -DE/DX = 0.0 | ! |
| ! R29 | R(10,21) | 1.9513 | -DE/DX = 0.0 | ! |
| ! R30 | R(10,22) | 1.9437 | -DE/DX = 0.0 | ! |
| ! R31 | R(11,19) | 1.922  | -DE/DX = 0.0 | ! |
| ! R32 | R(11,22) | 1.8957 | -DE/DX = 0.0 | ! |
| ! R33 | R(11,23) | 1.9287 | -DE/DX = 0.0 | ! |
| ! R34 | R(12,21) | 1.9492 | -DE/DX = 0.0 | ! |
| ! R35 | R(12,22) | 1.9422 | -DE/DX = 0.0 | ! |
| ! R36 | R(12,24) | 1.8882 | -DE/DX = 0.0 | ! |
| ! R37 | R(13,14) | 3.2706 | -DE/DX = 0.0 | ! |
| ! R38 | R(13,15) | 3.3169 | -DE/DX = 0.0 | ! |
| ! R39 | R(13,16) | 3.2492 | -DE/DX = 0.0 | ! |
| ! R40 | R(13,23) | 3.2994 | -DE/DX = 0.0 | ! |
| ! R41 | R(13,24) | 2.6847 | -DE/DX = 0.0 | ! |
| ! R42 | R(14,16) | 3.2473 | -DE/DX = 0.0 | ! |

|       |          |        |              |   |
|-------|----------|--------|--------------|---|
| ! R43 | R(14,17) | 2.6894 | -DE/DX = 0.0 | ! |
| ! R44 | R(14,21) | 3.2616 | -DE/DX = 0.0 | ! |
| ! R45 | R(14,24) | 3.2485 | -DE/DX = 0.0 | ! |
| ! R46 | R(15,16) | 2.6921 | -DE/DX = 0.0 | ! |
| ! R47 | R(15,18) | 3.3285 | -DE/DX = 0.0 | ! |
| ! R48 | R(15,19) | 3.3746 | -DE/DX = 0.0 | ! |
| ! R49 | R(15,25) | 3.3945 | -DE/DX = 0.0 | ! |
| ! R50 | R(16,17) | 3.2514 | -DE/DX = 0.0 | ! |
| ! R51 | R(16,18) | 3.247  | -DE/DX = 0.0 | ! |
| ! R52 | R(17,18) | 3.2699 | -DE/DX = 0.0 | ! |
| ! R53 | R(17,20) | 3.2462 | -DE/DX = 0.0 | ! |
| ! R54 | R(17,21) | 3.2626 | -DE/DX = 0.0 | ! |
| ! R55 | R(18,19) | 3.2843 | -DE/DX = 0.0 | ! |
| ! R56 | R(18,20) | 2.6869 | -DE/DX = 0.0 | ! |
| ! R57 | R(19,20) | 3.2661 | -DE/DX = 0.0 | ! |
| ! R58 | R(19,22) | 3.2593 | -DE/DX = 0.0 | ! |
| ! R59 | R(19,23) | 2.7823 | -DE/DX = 0.0 | ! |
| ! R60 | R(19,25) | 3.6241 | -DE/DX = 0.0 | ! |
| ! R61 | R(20,21) | 3.2639 | -DE/DX = 0.0 | ! |
| ! R62 | R(20,22) | 3.2552 | -DE/DX = 0.0 | ! |
| ! R63 | R(21,22) | 2.6802 | -DE/DX = 0.0 | ! |
| ! R64 | R(21,24) | 3.2594 | -DE/DX = 0.0 | ! |
| ! R65 | R(22,23) | 3.2822 | -DE/DX = 0.0 | ! |
| ! R66 | R(22,24) | 3.2417 | -DE/DX = 0.0 | ! |
| ! R67 | R(23,24) | 3.2857 | -DE/DX = 0.0 | ! |
| ! R68 | R(23,25) | 3.5589 | -DE/DX = 0.0 | ! |
| ! R69 | R(25,26) | 2.1662 | -DE/DX = 0.0 | ! |
| ! R70 | R(26,27) | 1.232  | -DE/DX = 0.0 | ! |
| ! R71 | R(27,28) | 1.2842 | -DE/DX = 0.0 | ! |
| ! R72 | R(28,29) | 1.0895 | -DE/DX = 0.0 | ! |

|       |             |          |              |   |
|-------|-------------|----------|--------------|---|
| ! R73 | R(28,30)    | 1.0811   | -DE/DX = 0.0 | ! |
| ! A1  | A(1,13,2)   | 123.0884 | -DE/DX = 0.0 | ! |
| ! A2  | A(1,13,3)   | 121.4562 | -DE/DX = 0.0 | ! |
| ! A3  | A(1,13,14)  | 92.2844  | -DE/DX = 0.0 | ! |
| ! A4  | A(1,13,23)  | 91.8508  | -DE/DX = 0.0 | ! |
| ! A5  | A(1,13,24)  | 137.0821 | -DE/DX = 0.0 | ! |
| ! A6  | A(2,13,3)   | 92.6907  | -DE/DX = 0.0 | ! |
| ! A7  | A(2,13,15)  | 128.8616 | -DE/DX = 0.0 | ! |
| ! A8  | A(2,13,16)  | 90.7244  | -DE/DX = 0.0 | ! |
| ! A9  | A(2,13,23)  | 109.3423 | -DE/DX = 0.0 | ! |
| ! A10 | A(3,13,14)  | 108.4779 | -DE/DX = 0.0 | ! |
| ! A11 | A(3,13,15)  | 91.4129  | -DE/DX = 0.0 | ! |
| ! A12 | A(3,13,16)  | 126.4839 | -DE/DX = 0.0 | ! |
| ! A13 | A(14,13,15) | 100.6148 | -DE/DX = 0.0 | ! |
| ! A14 | A(14,13,23) | 110.1909 | -DE/DX = 0.0 | ! |
| ! A15 | A(15,13,23) | 61.7164  | -DE/DX = 0.0 | ! |
| ! A16 | A(15,13,24) | 115.0595 | -DE/DX = 0.0 | ! |
| ! A17 | A(16,13,23) | 100.4656 | -DE/DX = 0.0 | ! |
| ! A18 | A(16,13,24) | 112.8387 | -DE/DX = 0.0 | ! |
| ! A19 | A(2,14,5)   | 123.5497 | -DE/DX = 0.0 | ! |
| ! A20 | A(2,14,6)   | 122.9388 | -DE/DX = 0.0 | ! |
| ! A21 | A(2,14,16)  | 91.8116  | -DE/DX = 0.0 | ! |
| ! A22 | A(2,14,17)  | 138.5466 | -DE/DX = 0.0 | ! |
| ! A23 | A(2,14,21)  | 92.6271  | -DE/DX = 0.0 | ! |
| ! A24 | A(5,14,6)   | 92.4306  | -DE/DX = 0.0 | ! |
| ! A25 | A(5,14,13)  | 128.2288 | -DE/DX = 0.0 | ! |
| ! A26 | A(5,14,16)  | 108.7427 | -DE/DX = 0.0 | ! |
| ! A27 | A(5,14,24)  | 91.2412  | -DE/DX = 0.0 | ! |
| ! A28 | A(6,14,13)  | 91.1859  | -DE/DX = 0.0 | ! |
| ! A29 | A(6,14,21)  | 108.872  | -DE/DX = 0.0 | ! |

|       |             |          |              |   |
|-------|-------------|----------|--------------|---|
| ! A30 | A(6,14,24)  | 127.7885 | -DE/DX = 0.0 | ! |
| ! A31 | A(13,14,17) | 114.0959 | -DE/DX = 0.0 | ! |
| ! A32 | A(13,14,21) | 100.1916 | -DE/DX = 0.0 | ! |
| ! A33 | A(16,14,21) | 109.0749 | -DE/DX = 0.0 | ! |
| ! A34 | A(16,14,24) | 99.3807  | -DE/DX = 0.0 | ! |
| ! A35 | A(17,14,24) | 113.8631 | -DE/DX = 0.0 | ! |
| ! A36 | A(1,15,4)   | 122.1174 | -DE/DX = 0.0 | ! |
| ! A37 | A(1,15,7)   | 92.6098  | -DE/DX = 0.0 | ! |
| ! A38 | A(1,15,18)  | 106.8259 | -DE/DX = 0.0 | ! |
| ! A39 | A(1,15,19)  | 123.6603 | -DE/DX = 0.0 | ! |
| ! A40 | A(1,15,25)  | 132.6792 | -DE/DX = 0.0 | ! |
| ! A41 | A(4,15,7)   | 121.0581 | -DE/DX = 0.0 | ! |
| ! A42 | A(4,15,13)  | 93.0658  | -DE/DX = 0.0 | ! |
| ! A43 | A(4,15,16)  | 137.7429 | -DE/DX = 0.0 | ! |
| ! A44 | A(4,15,18)  | 92.3893  | -DE/DX = 0.0 | ! |
| ! A45 | A(7,15,13)  | 107.0442 | -DE/DX = 0.0 | ! |
| ! A46 | A(7,15,19)  | 87.6283  | -DE/DX = 0.0 | ! |
| ! A47 | A(7,15,25)  | 134.3991 | -DE/DX = 0.0 | ! |
| ! A48 | A(13,15,18) | 107.2965 | -DE/DX = 0.0 | ! |
| ! A49 | A(13,15,19) | 97.9889  | -DE/DX = 0.0 | ! |
| ! A50 | A(13,15,25) | 111.9631 | -DE/DX = 0.0 | ! |
| ! A51 | A(16,15,19) | 110.4021 | -DE/DX = 0.0 | ! |
| ! A52 | A(16,15,25) | 174.0404 | -DE/DX = 0.0 | ! |
| ! A53 | A(18,15,25) | 113.7728 | -DE/DX = 0.0 | ! |
| ! A54 | A(1,16,6)   | 124.1183 | -DE/DX = 0.0 | ! |
| ! A55 | A(1,16,7)   | 91.8286  | -DE/DX = 0.0 | ! |
| ! A56 | A(1,16,14)  | 91.8245  | -DE/DX = 0.0 | ! |
| ! A57 | A(1,16,17)  | 128.8647 | -DE/DX = 0.0 | ! |
| ! A58 | A(1,16,18)  | 109.4798 | -DE/DX = 0.0 | ! |
| ! A59 | A(6,16,7)   | 124.0683 | -DE/DX = 0.0 | ! |

|       |             |          |              |   |
|-------|-------------|----------|--------------|---|
| ! A60 | A(6,16,13)  | 92.9885  | -DE/DX = 0.0 | ! |
| ! A61 | A(6,16,15)  | 142.134  | -DE/DX = 0.0 | ! |
| ! A62 | A(6,16,18)  | 92.8058  | -DE/DX = 0.0 | ! |
| ! A63 | A(7,16,13)  | 109.1578 | -DE/DX = 0.0 | ! |
| ! A64 | A(7,16,14)  | 128.7994 | -DE/DX = 0.0 | ! |
| ! A65 | A(7,16,17)  | 91.9043  | -DE/DX = 0.0 | ! |
| ! A66 | A(13,16,17) | 100.8643 | -DE/DX = 0.0 | ! |
| ! A67 | A(13,16,18) | 110.9508 | -DE/DX = 0.0 | ! |
| ! A68 | A(14,16,15) | 116.8704 | -DE/DX = 0.0 | ! |
| ! A69 | A(14,16,18) | 100.8704 | -DE/DX = 0.0 | ! |
| ! A70 | A(15,16,17) | 116.9921 | -DE/DX = 0.0 | ! |
| ! A71 | A(5,17,6)   | 92.4796  | -DE/DX = 0.0 | ! |
| ! A72 | A(5,17,9)   | 123.6819 | -DE/DX = 0.0 | ! |
| ! A73 | A(5,17,16)  | 108.623  | -DE/DX = 0.0 | ! |
| ! A74 | A(5,17,18)  | 128.2586 | -DE/DX = 0.0 | ! |
| ! A75 | A(5,17,20)  | 91.2984  | -DE/DX = 0.0 | ! |
| ! A76 | A(6,17,9)   | 122.7255 | -DE/DX = 0.0 | ! |
| ! A77 | A(6,17,18)  | 90.9736  | -DE/DX = 0.0 | ! |
| ! A78 | A(6,17,20)  | 127.7074 | -DE/DX = 0.0 | ! |
| ! A79 | A(6,17,21)  | 108.8465 | -DE/DX = 0.0 | ! |
| ! A80 | A(9,17,14)  | 138.4946 | -DE/DX = 0.0 | ! |
| ! A81 | A(9,17,16)  | 91.7431  | -DE/DX = 0.0 | ! |
| ! A82 | A(9,17,21)  | 92.7999  | -DE/DX = 0.0 | ! |
| ! A83 | A(14,17,18) | 113.9518 | -DE/DX = 0.0 | ! |
| ! A84 | A(14,17,20) | 113.8694 | -DE/DX = 0.0 | ! |
| ! A85 | A(16,17,20) | 99.3439  | -DE/DX = 0.0 | ! |
| ! A86 | A(16,17,21) | 108.9478 | -DE/DX = 0.0 | ! |
| ! A87 | A(18,17,21) | 100.2878 | -DE/DX = 0.0 | ! |
| ! A88 | A(7,18,8)   | 121.0631 | -DE/DX = 0.0 | ! |
| ! A89 | A(7,18,9)   | 123.4211 | -DE/DX = 0.0 | ! |



|        |             |          |              |   |
|--------|-------------|----------|--------------|---|
| ! A90  | A(7,18,17)  | 92.5581  | -DE/DX = 0.0 | ! |
| ! A91  | A(7,18,19)  | 91.1946  | -DE/DX = 0.0 | ! |
| ! A92  | A(7,18,20)  | 136.9011 | -DE/DX = 0.0 | ! |
| ! A93  | A(8,18,9)   | 92.6534  | -DE/DX = 0.0 | ! |
| ! A94  | A(8,18,15)  | 91.3561  | -DE/DX = 0.0 | ! |
| ! A95  | A(8,18,16)  | 126.4897 | -DE/DX = 0.0 | ! |
| ! A96  | A(8,18,17)  | 108.4731 | -DE/DX = 0.0 | ! |
| ! A97  | A(9,18,15)  | 128.8253 | -DE/DX = 0.0 | ! |
| ! A98  | A(9,18,16)  | 90.8729  | -DE/DX = 0.0 | ! |
| ! A99  | A(9,18,19)  | 108.8885 | -DE/DX = 0.0 | ! |
| ! A100 | A(15,18,17) | 100.5737 | -DE/DX = 0.0 | ! |
| ! A101 | A(15,18,20) | 114.915  | -DE/DX = 0.0 | ! |
| ! A102 | A(16,18,19) | 99.8269  | -DE/DX = 0.0 | ! |
| ! A103 | A(16,18,20) | 112.8461 | -DE/DX = 0.0 | ! |
| ! A104 | A(17,18,19) | 109.4734 | -DE/DX = 0.0 | ! |
| ! A105 | A(4,19,8)   | 123.7437 | -DE/DX = 0.0 | ! |
| ! A106 | A(4,19,11)  | 91.4215  | -DE/DX = 0.0 | ! |
| ! A107 | A(4,19,18)  | 92.9466  | -DE/DX = 0.0 | ! |
| ! A108 | A(4,19,20)  | 130.8012 | -DE/DX = 0.0 | ! |
| ! A109 | A(4,19,22)  | 110.7715 | -DE/DX = 0.0 | ! |
| ! A110 | A(4,19,23)  | 47.927   | -DE/DX = 0.0 | ! |
| ! A111 | A(8,19,11)  | 123.1188 | -DE/DX = 0.0 | ! |
| ! A112 | A(8,19,15)  | 91.209   | -DE/DX = 0.0 | ! |
| ! A113 | A(8,19,22)  | 92.0061  | -DE/DX = 0.0 | ! |
| ! A114 | A(8,19,23)  | 137.5805 | -DE/DX = 0.0 | ! |
| ! A115 | A(8,19,25)  | 132.2704 | -DE/DX = 0.0 | ! |
| ! A116 | A(11,19,15) | 106.3066 | -DE/DX = 0.0 | ! |
| ! A117 | A(11,19,18) | 125.9372 | -DE/DX = 0.0 | ! |
| ! A118 | A(11,19,20) | 90.9839  | -DE/DX = 0.0 | ! |
| ! A119 | A(11,19,25) | 101.4767 | -DE/DX = 0.0 | ! |

|        |             |          |              |   |
|--------|-------------|----------|--------------|---|
| ! A120 | A(15,19,20) | 99.8681  | -DE/DX = 0.0 | ! |
| ! A121 | A(15,19,22) | 108.9975 | -DE/DX = 0.0 | ! |
| ! A122 | A(15,19,23) | 66.0845  | -DE/DX = 0.0 | ! |
| ! A123 | A(18,19,22) | 99.2888  | -DE/DX = 0.0 | ! |
| ! A124 | A(18,19,23) | 113.9672 | -DE/DX = 0.0 | ! |
| ! A125 | A(18,19,25) | 109.0995 | -DE/DX = 0.0 | ! |
| ! A126 | A(20,19,23) | 113.8199 | -DE/DX = 0.0 | ! |
| ! A127 | A(20,19,25) | 156.7149 | -DE/DX = 0.0 | ! |
| ! A128 | A(22,19,25) | 130.1673 | -DE/DX = 0.0 | ! |
| ! A129 | A(8,20,9)   | 92.4599  | -DE/DX = 0.0 | ! |
| ! A130 | A(8,20,10)  | 122.6357 | -DE/DX = 0.0 | ! |
| ! A131 | A(8,20,17)  | 109.1032 | -DE/DX = 0.0 | ! |
| ! A132 | A(8,20,21)  | 127.8444 | -DE/DX = 0.0 | ! |
| ! A133 | A(8,20,22)  | 90.682   | -DE/DX = 0.0 | ! |
| ! A134 | A(9,20,10)  | 123.8339 | -DE/DX = 0.0 | ! |
| ! A135 | A(9,20,19)  | 109.6335 | -DE/DX = 0.0 | ! |
| ! A136 | A(9,20,21)  | 91.7759  | -DE/DX = 0.0 | ! |
| ! A137 | A(9,20,22)  | 128.0822 | -DE/DX = 0.0 | ! |
| ! A138 | A(10,20,17) | 92.4257  | -DE/DX = 0.0 | ! |
| ! A139 | A(10,20,18) | 138.7304 | -DE/DX = 0.0 | ! |
| ! A140 | A(10,20,19) | 92.1224  | -DE/DX = 0.0 | ! |
| ! A141 | A(17,20,19) | 110.5211 | -DE/DX = 0.0 | ! |
| ! A142 | A(17,20,22) | 99.7366  | -DE/DX = 0.0 | ! |
| ! A143 | A(18,20,21) | 114.505  | -DE/DX = 0.0 | ! |
| ! A144 | A(18,20,22) | 113.7662 | -DE/DX = 0.0 | ! |
| ! A145 | A(19,20,21) | 100.5977 | -DE/DX = 0.0 | ! |
| ! A146 | A(5,21,10)  | 122.7717 | -DE/DX = 0.0 | ! |
| ! A147 | A(5,21,12)  | 123.0035 | -DE/DX = 0.0 | ! |
| ! A148 | A(5,21,20)  | 91.8694  | -DE/DX = 0.0 | ! |
| ! A149 | A(5,21,22)  | 137.5102 | -DE/DX = 0.0 | ! |

|        |             |          |              |   |
|--------|-------------|----------|--------------|---|
| ! A150 | A(5,21,24)  | 92.0413  | -DE/DX = 0.0 | ! |
| ! A151 | A(10,21,12) | 92.4683  | -DE/DX = 0.0 | ! |
| ! A152 | A(10,21,14) | 127.4341 | -DE/DX = 0.0 | ! |
| ! A153 | A(10,21,17) | 90.7607  | -DE/DX = 0.0 | ! |
| ! A154 | A(10,21,24) | 108.6489 | -DE/DX = 0.0 | ! |
| ! A155 | A(12,21,14) | 90.9448  | -DE/DX = 0.0 | ! |
| ! A156 | A(12,21,17) | 127.7825 | -DE/DX = 0.0 | ! |
| ! A157 | A(12,21,20) | 108.9555 | -DE/DX = 0.0 | ! |
| ! A158 | A(14,21,20) | 99.5856  | -DE/DX = 0.0 | ! |
| ! A159 | A(14,21,22) | 113.0621 | -DE/DX = 0.0 | ! |
| ! A160 | A(17,21,22) | 113.168  | -DE/DX = 0.0 | ! |
| ! A161 | A(17,21,24) | 99.7071  | -DE/DX = 0.0 | ! |
| ! A162 | A(20,21,24) | 109.1954 | -DE/DX = 0.0 | ! |
| ! A163 | A(10,22,11) | 122.8096 | -DE/DX = 0.0 | ! |
| ! A164 | A(10,22,12) | 92.9159  | -DE/DX = 0.0 | ! |
| ! A165 | A(10,22,19) | 91.3001  | -DE/DX = 0.0 | ! |
| ! A166 | A(10,22,23) | 130.2583 | -DE/DX = 0.0 | ! |
| ! A167 | A(10,22,24) | 109.5282 | -DE/DX = 0.0 | ! |
| ! A168 | A(11,22,12) | 123.0186 | -DE/DX = 0.0 | ! |
| ! A169 | A(11,22,20) | 91.7988  | -DE/DX = 0.0 | ! |
| ! A170 | A(11,22,21) | 137.8285 | -DE/DX = 0.0 | ! |
| ! A171 | A(11,22,24) | 91.6572  | -DE/DX = 0.0 | ! |
| ! A172 | A(12,22,19) | 130.0189 | -DE/DX = 0.0 | ! |
| ! A173 | A(12,22,20) | 109.4804 | -DE/DX = 0.0 | ! |
| ! A174 | A(12,22,23) | 91.919   | -DE/DX = 0.0 | ! |
| ! A175 | A(19,22,21) | 115.1869 | -DE/DX = 0.0 | ! |
| ! A176 | A(19,22,24) | 101.376  | -DE/DX = 0.0 | ! |
| ! A177 | A(20,22,23) | 101.8275 | -DE/DX = 0.0 | ! |
| ! A178 | A(20,22,24) | 109.8544 | -DE/DX = 0.0 | ! |
| ! A179 | A(21,22,23) | 115.8187 | -DE/DX = 0.0 | ! |

|        |             |          |              |   |
|--------|-------------|----------|--------------|---|
| ! A180 | A(3,23,11)  | 121.2977 | -DE/DX = 0.0 | ! |
| ! A181 | A(3,23,19)  | 134.6014 | -DE/DX = 0.0 | ! |
| ! A182 | A(3,23,22)  | 90.7117  | -DE/DX = 0.0 | ! |
| ! A183 | A(3,23,25)  | 131.3984 | -DE/DX = 0.0 | ! |
| ! A184 | A(11,23,13) | 124.1462 | -DE/DX = 0.0 | ! |
| ! A185 | A(11,23,24) | 89.7382  | -DE/DX = 0.0 | ! |
| ! A186 | A(11,23,25) | 103.5407 | -DE/DX = 0.0 | ! |
| ! A187 | A(13,23,19) | 111.9867 | -DE/DX = 0.0 | ! |
| ! A188 | A(13,23,22) | 98.2256  | -DE/DX = 0.0 | ! |
| ! A189 | A(13,23,25) | 108.3515 | -DE/DX = 0.0 | ! |
| ! A190 | A(19,23,24) | 111.7094 | -DE/DX = 0.0 | ! |
| ! A191 | A(22,23,25) | 131.751  | -DE/DX = 0.0 | ! |
| ! A192 | A(24,23,25) | 155.8379 | -DE/DX = 0.0 | ! |
| ! A193 | A(2,24,3)   | 92.5514  | -DE/DX = 0.0 | ! |
| ! A194 | A(2,24,12)  | 123.7581 | -DE/DX = 0.0 | ! |
| ! A195 | A(2,24,21)  | 91.6886  | -DE/DX = 0.0 | ! |
| ! A196 | A(2,24,22)  | 128.1615 | -DE/DX = 0.0 | ! |
| ! A197 | A(2,24,23)  | 109.9317 | -DE/DX = 0.0 | ! |
| ! A198 | A(3,24,12)  | 122.9063 | -DE/DX = 0.0 | ! |
| ! A199 | A(3,24,14)  | 109.0924 | -DE/DX = 0.0 | ! |
| ! A200 | A(3,24,21)  | 127.8749 | -DE/DX = 0.0 | ! |
| ! A201 | A(3,24,22)  | 90.6162  | -DE/DX = 0.0 | ! |
| ! A202 | A(12,24,13) | 139.0791 | -DE/DX = 0.0 | ! |
| ! A203 | A(12,24,14) | 92.4692  | -DE/DX = 0.0 | ! |
| ! A204 | A(12,24,23) | 92.8237  | -DE/DX = 0.0 | ! |
| ! A205 | A(13,24,21) | 114.5727 | -DE/DX = 0.0 | ! |
| ! A206 | A(13,24,22) | 113.8608 | -DE/DX = 0.0 | ! |
| ! A207 | A(14,24,22) | 99.8646  | -DE/DX = 0.0 | ! |
| ! A208 | A(14,24,23) | 111.0953 | -DE/DX = 0.0 | ! |
| ! A209 | A(21,24,23) | 101.3058 | -DE/DX = 0.0 | ! |

|        |                  |          |              |   |
|--------|------------------|----------|--------------|---|
| ! A210 | A(4,25,23)       | 31.7948  | -DE/DX = 0.0 | ! |
| ! A211 | A(15,25,23)      | 58.3678  | -DE/DX = 0.0 | ! |
| ! A212 | A(15,25,26)      | 142.9217 | -DE/DX = 0.0 | ! |
| ! A213 | A(19,25,26)      | 121.712  | -DE/DX = 0.0 | ! |
| ! A214 | A(23,25,26)      | 152.2003 | -DE/DX = 0.0 | ! |
| ! A215 | A(25,26,27)      | 179.7052 | -DE/DX = 0.0 | ! |
| ! A216 | A(26,27,28)      | 137.2785 | -DE/DX = 0.0 | ! |
| ! A217 | A(27,28,29)      | 120.7525 | -DE/DX = 0.0 | ! |
| ! A218 | A(27,28,30)      | 118.274  | -DE/DX = 0.0 | ! |
| ! A219 | A(29,28,30)      | 120.9734 | -DE/DX = 0.0 | ! |
| ! A220 | L(4,25,26,23,-1) | 183.9952 | -DE/DX = 0.0 | ! |
| ! A221 | L(4,25,26,23,-2) | 243.6788 | -DE/DX = 0.0 | ! |

---

**Table S3:** Optimized Parameters of the studied systems bond length and angles for the interacted systems. (Angstroms and Degrees)

**CH2N2@ZrMgO**

| Name  | Definition | Value  | Derivative Info. | ! |
|-------|------------|--------|------------------|---|
| ----- |            |        |                  |   |
| ! R1  | R(1,13)    | 1.8898 | -DE/DX = 0.0     | ! |
| ! R2  | R(1,15)    | 1.9356 | -DE/DX = 0.0     | ! |
| ! R3  | R(1,16)    | 1.9493 | -DE/DX = 0.0     | ! |
| ! R4  | R(2,13)    | 1.9501 | -DE/DX = 0.0     | ! |
| ! R5  | R(2,14)    | 1.8925 | -DE/DX = 0.0     | ! |
| ! R6  | R(2,24)    | 1.9451 | -DE/DX = 0.0     | ! |
| ! R7  | R(3,13)    | 1.9463 | -DE/DX = 0.0     | ! |
| ! R8  | R(3,23)    | 1.8849 | -DE/DX = 0.0     | ! |
| ! R9  | R(3,24)    | 1.9427 | -DE/DX = 0.0     | ! |
| ! R10 | R(4,19)    | 3.1197 | -DE/DX = 0.0     | ! |
| ! R11 | R(4,23)    | 1.9897 | -DE/DX = 0.0     | ! |
| ! R12 | R(4,25)    | 1.9611 | -DE/DX = 0.0     | ! |

|       |          |        |              |   |
|-------|----------|--------|--------------|---|
| ! R13 | R(5,14)  | 1.95   | -DE/DX = 0.0 | ! |
| ! R14 | R(5,17)  | 1.9514 | -DE/DX = 0.0 | ! |
| ! R15 | R(5,21)  | 1.8907 | -DE/DX = 0.0 | ! |
| ! R16 | R(6,14)  | 1.9471 | -DE/DX = 0.0 | ! |
| ! R17 | R(6,16)  | 1.885  | -DE/DX = 0.0 | ! |
| ! R18 | R(6,17)  | 1.9456 | -DE/DX = 0.0 | ! |
| ! R19 | R(7,15)  | 1.9272 | -DE/DX = 0.0 | ! |
| ! R20 | R(7,16)  | 1.9519 | -DE/DX = 0.0 | ! |
| ! R21 | R(7,18)  | 1.89   | -DE/DX = 0.0 | ! |
| ! R22 | R(8,18)  | 1.9366 | -DE/DX = 0.0 | ! |
| ! R23 | R(8,19)  | 1.8874 | -DE/DX = 0.0 | ! |
| ! R24 | R(8,20)  | 1.9383 | -DE/DX = 0.0 | ! |
| ! R25 | R(9,17)  | 1.8863 | -DE/DX = 0.0 | ! |
| ! R26 | R(9,18)  | 1.9573 | -DE/DX = 0.0 | ! |
| ! R27 | R(9,20)  | 1.9398 | -DE/DX = 0.0 | ! |
| ! R28 | R(10,20) | 1.8892 | -DE/DX = 0.0 | ! |
| ! R29 | R(10,21) | 1.9498 | -DE/DX = 0.0 | ! |
| ! R30 | R(10,22) | 1.9453 | -DE/DX = 0.0 | ! |
| ! R31 | R(11,19) | 1.9343 | -DE/DX = 0.0 | ! |
| ! R32 | R(11,22) | 1.9017 | -DE/DX = 0.0 | ! |
| ! R33 | R(11,23) | 1.9179 | -DE/DX = 0.0 | ! |
| ! R34 | R(12,21) | 1.9497 | -DE/DX = 0.0 | ! |
| ! R35 | R(12,22) | 1.9406 | -DE/DX = 0.0 | ! |
| ! R36 | R(12,24) | 1.885  | -DE/DX = 0.0 | ! |
| ! R37 | R(13,14) | 3.2707 | -DE/DX = 0.0 | ! |
| ! R38 | R(13,15) | 3.2759 | -DE/DX = 0.0 | ! |
| ! R39 | R(13,16) | 3.2218 | -DE/DX = 0.0 | ! |
| ! R40 | R(13,23) | 3.2981 | -DE/DX = 0.0 | ! |
| ! R41 | R(13,24) | 2.6843 | -DE/DX = 0.0 | ! |
| ! R42 | R(14,16) | 3.2513 | -DE/DX = 0.0 | ! |

|       |            |          |                  |   |
|-------|------------|----------|------------------|---|
| ! R43 | R(14,17)   | 2.6867   | -DE/DX = 0.0     | ! |
| ! R44 | R(14,21)   | 3.2774   | -DE/DX = 0.0     | ! |
| ! R45 | R(14,24)   | 3.2302   | -DE/DX = 0.0     | ! |
| ! R46 | R(15,16)   | 2.6891   | -DE/DX = 0.0     | ! |
| ! R47 | R(15,18)   | 3.3533   | -DE/DX = 0.0     | ! |
| ! R48 | R(15,25)   | 3.4247   | -DE/DX = 0.0     | ! |
| ! R49 | R(16,17)   | 3.2329   | -DE/DX = 0.0     | ! |
| ! R50 | R(16,18)   | 3.2663   | -DE/DX = 0.0     | ! |
| ! R51 | R(17,18)   | 3.2949   | -DE/DX = 0.0     | ! |
| ! R52 | R(17,20)   | 3.255    | -DE/DX = 0.0     | ! |
| ! R53 | R(17,21)   | 3.2546   | -DE/DX = 0.0     | ! |
| ! R54 | R(18,19)   | 3.4431   | -DE/DX = 0.0     | ! |
| ! R55 | R(18,20)   | 2.6688   | -DE/DX = 0.0     | ! |
| ! R56 | R(19,20)   | 3.3114   | -DE/DX = 0.0     | ! |
| ! R57 | R(19,22)   | 3.2693   | -DE/DX = 0.0     | ! |
| ! R58 | R(19,23)   | 3.1388   | -DE/DX = 0.0     | ! |
| ! R59 | R(20,21)   | 3.2613   | -DE/DX = 0.0     | ! |
| ! R60 | R(20,22)   | 3.2067   | -DE/DX = 0.0     | ! |
| ! R61 | R(21,22)   | 2.6765   | -DE/DX = 0.0     | ! |
| ! R62 | R(21,24)   | 3.2679   | -DE/DX = 0.0     | ! |
| ! R63 | R(22,23)   | 3.2203   | -DE/DX = 0.0     | ! |
| ! R64 | R(22,24)   | 3.235    | -DE/DX = 0.0     | ! |
| ! R65 | R(23,24)   | 3.2995   | -DE/DX = 0.0     | ! |
| ! R66 | R(25,26)   | 1.892    | -DE/DX = -0.0001 | ! |
| ! R67 | R(26,27)   | 1.3507   | -DE/DX = 0.0     | ! |
| ! R68 | R(27,28)   | 1.2756   | -DE/DX = 0.0001  | ! |
| ! R69 | R(28,29)   | 1.0887   | -DE/DX = 0.0     | ! |
| ! R70 | R(28,30)   | 1.0835   | -DE/DX = 0.0     | ! |
| ! A1  | A(19,4,25) | 78.2847  | -DE/DX = 0.0     | ! |
| ! A2  | A(23,4,25) | 121.2565 | -DE/DX = 0.0     | ! |

|       |             |          |              |   |
|-------|-------------|----------|--------------|---|
| ! A3  | A(1,13,2)   | 123.9468 | -DE/DX = 0.0 | ! |
| ! A4  | A(1,13,3)   | 121.8891 | -DE/DX = 0.0 | ! |
| ! A5  | A(1,13,14)  | 93.3107  | -DE/DX = 0.0 | ! |
| ! A6  | A(1,13,23)  | 92.0345  | -DE/DX = 0.0 | ! |
| ! A7  | A(1,13,24)  | 138.8787 | -DE/DX = 0.0 | ! |
| ! A8  | A(2,13,3)   | 92.5143  | -DE/DX = 0.0 | ! |
| ! A9  | A(2,13,15)  | 130.7584 | -DE/DX = 0.0 | ! |
| ! A10 | A(2,13,16)  | 91.1425  | -DE/DX = 0.0 | ! |
| ! A11 | A(2,13,23)  | 109.3943 | -DE/DX = 0.0 | ! |
| ! A12 | A(3,13,14)  | 107.3302 | -DE/DX = 0.0 | ! |
| ! A13 | A(3,13,15)  | 90.4673  | -DE/DX = 0.0 | ! |
| ! A14 | A(3,13,16)  | 124.3507 | -DE/DX = 0.0 | ! |
| ! A15 | A(14,13,15) | 102.1996 | -DE/DX = 0.0 | ! |
| ! A16 | A(14,13,23) | 108.9818 | -DE/DX = 0.0 | ! |
| ! A17 | A(15,13,23) | 60.5332  | -DE/DX = 0.0 | ! |
| ! A18 | A(15,13,24) | 116.0143 | -DE/DX = 0.0 | ! |
| ! A19 | A(16,13,23) | 98.1214  | -DE/DX = 0.0 | ! |
| ! A20 | A(16,13,24) | 112.3412 | -DE/DX = 0.0 | ! |
| ! A21 | A(2,14,5)   | 123.9138 | -DE/DX = 0.0 | ! |
| ! A22 | A(2,14,6)   | 122.2208 | -DE/DX = 0.0 | ! |
| ! A23 | A(2,14,16)  | 91.3075  | -DE/DX = 0.0 | ! |
| ! A24 | A(2,14,17)  | 137.9954 | -DE/DX = 0.0 | ! |
| ! A25 | A(2,14,21)  | 93.3296  | -DE/DX = 0.0 | ! |
| ! A26 | A(5,14,6)   | 92.5502  | -DE/DX = 0.0 | ! |
| ! A27 | A(5,14,13)  | 128.1725 | -DE/DX = 0.0 | ! |
| ! A28 | A(5,14,16)  | 108.4849 | -DE/DX = 0.0 | ! |
| ! A29 | A(5,14,24)  | 91.0925  | -DE/DX = 0.0 | ! |
| ! A30 | A(6,14,13)  | 90.4085  | -DE/DX = 0.0 | ! |
| ! A31 | A(6,14,21)  | 108.6319 | -DE/DX = 0.0 | ! |
| ! A32 | A(6,14,24)  | 126.9758 | -DE/DX = 0.0 | ! |



|       |             |          |              |   |
|-------|-------------|----------|--------------|---|
| ! A33 | A(13,14,17) | 113.2007 | -DE/DX = 0.0 | ! |
| ! A34 | A(13,14,21) | 100.5734 | -DE/DX = 0.0 | ! |
| ! A35 | A(16,14,21) | 108.6694 | -DE/DX = 0.0 | ! |
| ! A36 | A(16,14,24) | 98.6373  | -DE/DX = 0.0 | ! |
| ! A37 | A(17,14,24) | 113.0139 | -DE/DX = 0.0 | ! |
| ! A38 | A(1,15,7)   | 92.8883  | -DE/DX = 0.0 | ! |
| ! A39 | A(1,15,18)  | 106.9549 | -DE/DX = 0.0 | ! |
| ! A40 | A(1,15,25)  | 143.7495 | -DE/DX = 0.0 | ! |
| ! A41 | A(7,15,13)  | 106.0693 | -DE/DX = 0.0 | ! |
| ! A42 | A(7,15,25)  | 119.9297 | -DE/DX = 0.0 | ! |
| ! A43 | A(13,15,18) | 105.7023 | -DE/DX = 0.0 | ! |
| ! A44 | A(13,15,25) | 117.2741 | -DE/DX = 0.0 | ! |
| ! A45 | A(18,15,25) | 97.8449  | -DE/DX = 0.0 | ! |
| ! A46 | A(1,16,6)   | 124.5714 | -DE/DX = 0.0 | ! |
| ! A47 | A(1,16,7)   | 91.7097  | -DE/DX = 0.0 | ! |
| ! A48 | A(1,16,14)  | 92.7679  | -DE/DX = 0.0 | ! |
| ! A49 | A(1,16,17)  | 131.0    | -DE/DX = 0.0 | ! |
| ! A50 | A(1,16,18)  | 109.7724 | -DE/DX = 0.0 | ! |
| ! A51 | A(6,16,7)   | 124.8192 | -DE/DX = 0.0 | ! |
| ! A52 | A(6,16,13)  | 93.05    | -DE/DX = 0.0 | ! |
| ! A53 | A(6,16,15)  | 143.9918 | -DE/DX = 0.0 | ! |
| ! A54 | A(6,16,18)  | 93.8705  | -DE/DX = 0.0 | ! |
| ! A55 | A(7,16,13)  | 107.3506 | -DE/DX = 0.0 | ! |
| ! A56 | A(7,16,14)  | 128.0145 | -DE/DX = 0.0 | ! |
| ! A57 | A(7,16,17)  | 92.0413  | -DE/DX = 0.0 | ! |
| ! A58 | A(13,16,17) | 101.0918 | -DE/DX = 0.0 | ! |
| ! A59 | A(13,16,18) | 109.0588 | -DE/DX = 0.0 | ! |
| ! A60 | A(14,16,15) | 117.7979 | -DE/DX = 0.0 | ! |
| ! A61 | A(14,16,18) | 100.4733 | -DE/DX = 0.0 | ! |
| ! A62 | A(15,16,17) | 118.9981 | -DE/DX = 0.0 | ! |

|       |             |          |              |   |
|-------|-------------|----------|--------------|---|
| ! A63 | A(5,17,6)   | 92.5509  | -DE/DX = 0.0 | ! |
| ! A64 | A(5,17,9)   | 123.5936 | -DE/DX = 0.0 | ! |
| ! A65 | A(5,17,16)  | 109.1267 | -DE/DX = 0.0 | ! |
| ! A66 | A(5,17,18)  | 126.7283 | -DE/DX = 0.0 | ! |
| ! A67 | A(5,17,20)  | 91.5309  | -DE/DX = 0.0 | ! |
| ! A68 | A(6,17,9)   | 122.8619 | -DE/DX = 0.0 | ! |
| ! A69 | A(6,17,18)  | 91.8393  | -DE/DX = 0.0 | ! |
| ! A70 | A(6,17,20)  | 129.5811 | -DE/DX = 0.0 | ! |
| ! A71 | A(6,17,21)  | 109.5239 | -DE/DX = 0.0 | ! |
| ! A72 | A(9,17,14)  | 138.3207 | -DE/DX = 0.0 | ! |
| ! A73 | A(9,17,16)  | 91.3928  | -DE/DX = 0.0 | ! |
| ! A74 | A(9,17,21)  | 92.3219  | -DE/DX = 0.0 | ! |
| ! A75 | A(14,17,18) | 113.3833 | -DE/DX = 0.0 | ! |
| ! A76 | A(14,17,20) | 115.0876 | -DE/DX = 0.0 | ! |
| ! A77 | A(16,17,20) | 100.7238 | -DE/DX = 0.0 | ! |
| ! A78 | A(16,17,21) | 109.6919 | -DE/DX = 0.0 | ! |
| ! A79 | A(18,17,21) | 98.498   | -DE/DX = 0.0 | ! |
| ! A80 | A(7,18,8)   | 127.8028 | -DE/DX = 0.0 | ! |
| ! A81 | A(7,18,9)   | 121.0556 | -DE/DX = 0.0 | ! |
| ! A82 | A(7,18,17)  | 91.3001  | -DE/DX = 0.0 | ! |
| ! A83 | A(7,18,19)  | 102.3634 | -DE/DX = 0.0 | ! |
| ! A84 | A(7,18,20)  | 139.7339 | -DE/DX = 0.0 | ! |
| ! A85 | A(8,18,9)   | 92.575   | -DE/DX = 0.0 | ! |
| ! A86 | A(8,18,15)  | 99.0863  | -DE/DX = 0.0 | ! |
| ! A87 | A(8,18,16)  | 132.5276 | -DE/DX = 0.0 | ! |
| ! A88 | A(8,18,17)  | 109.3108 | -DE/DX = 0.0 | ! |
| ! A89 | A(9,18,15)  | 129.2561 | -DE/DX = 0.0 | ! |
| ! A90 | A(9,18,16)  | 89.1331  | -DE/DX = 0.0 | ! |
| ! A91 | A(9,18,19)  | 109.6527 | -DE/DX = 0.0 | ! |
| ! A92 | A(15,18,17) | 100.4595 | -DE/DX = 0.0 | ! |

|        |             |          |              |   |
|--------|-------------|----------|--------------|---|
| ! A93  | A(15,18,19) | 73.6845  | -DE/DX = 0.0 | ! |
| ! A94  | A(15,18,20) | 120.2386 | -DE/DX = 0.0 | ! |
| ! A95  | A(16,18,19) | 112.121  | -DE/DX = 0.0 | ! |
| ! A96  | A(16,18,20) | 114.2897 | -DE/DX = 0.0 | ! |
| ! A97  | A(17,18,19) | 114.933  | -DE/DX = 0.0 | ! |
| ! A98  | A(4,19,8)   | 105.9788 | -DE/DX = 0.0 | ! |
| ! A99  | A(4,19,11)  | 72.3272  | -DE/DX = 0.0 | ! |
| ! A100 | A(4,19,18)  | 79.8608  | -DE/DX = 0.0 | ! |
| ! A101 | A(4,19,20)  | 113.4943 | -DE/DX = 0.0 | ! |
| ! A102 | A(4,19,22)  | 94.5911  | -DE/DX = 0.0 | ! |
| ! A103 | A(8,19,11)  | 114.3562 | -DE/DX = 0.0 | ! |
| ! A104 | A(8,19,22)  | 87.6125  | -DE/DX = 0.0 | ! |
| ! A105 | A(8,19,23)  | 114.8467 | -DE/DX = 0.0 | ! |
| ! A106 | A(11,19,18) | 107.6868 | -DE/DX = 0.0 | ! |
| ! A107 | A(11,19,20) | 87.8599  | -DE/DX = 0.0 | ! |
| ! A108 | A(18,19,22) | 90.9817  | -DE/DX = 0.0 | ! |
| ! A109 | A(18,19,23) | 94.4717  | -DE/DX = 0.0 | ! |
| ! A110 | A(20,19,23) | 102.1442 | -DE/DX = 0.0 | ! |
| ! A111 | A(8,20,9)   | 93.0657  | -DE/DX = 0.0 | ! |
| ! A112 | A(8,20,10)  | 121.5767 | -DE/DX = 0.0 | ! |
| ! A113 | A(8,20,17)  | 110.7695 | -DE/DX = 0.0 | ! |
| ! A114 | A(8,20,21)  | 128.166  | -DE/DX = 0.0 | ! |
| ! A115 | A(8,20,22)  | 88.6003  | -DE/DX = 0.0 | ! |
| ! A116 | A(9,20,10)  | 123.3936 | -DE/DX = 0.0 | ! |
| ! A117 | A(9,20,19)  | 115.3013 | -DE/DX = 0.0 | ! |
| ! A118 | A(9,20,21)  | 91.1287  | -DE/DX = 0.0 | ! |
| ! A119 | A(9,20,22)  | 125.014  | -DE/DX = 0.0 | ! |
| ! A120 | A(10,20,17) | 92.2692  | -DE/DX = 0.0 | ! |
| ! A121 | A(10,20,18) | 136.2082 | -DE/DX = 0.0 | ! |
| ! A122 | A(10,20,19) | 92.1773  | -DE/DX = 0.0 | ! |

|        |             |          |              |   |
|--------|-------------|----------|--------------|---|
| ! A123 | A(17,20,19) | 119.8051 | -DE/DX = 0.0 | ! |
| ! A124 | A(17,20,22) | 98.5229  | -DE/DX = 0.0 | ! |
| ! A125 | A(18,20,21) | 113.2062 | -DE/DX = 0.0 | ! |
| ! A126 | A(18,20,22) | 108.8243 | -DE/DX = 0.0 | ! |
| ! A127 | A(19,20,21) | 105.6986 | -DE/DX = 0.0 | ! |
| ! A128 | A(5,21,10)  | 123.4689 | -DE/DX = 0.0 | ! |
| ! A129 | A(5,21,12)  | 121.7845 | -DE/DX = 0.0 | ! |
| ! A130 | A(5,21,20)  | 92.4732  | -DE/DX = 0.0 | ! |
| ! A131 | A(5,21,22)  | 135.4761 | -DE/DX = 0.0 | ! |
| ! A132 | A(5,21,24)  | 91.0362  | -DE/DX = 0.0 | ! |
| ! A133 | A(10,21,12) | 92.3781  | -DE/DX = 0.0 | ! |
| ! A134 | A(10,21,14) | 128.3841 | -DE/DX = 0.0 | ! |
| ! A135 | A(10,21,17) | 91.1611  | -DE/DX = 0.0 | ! |
| ! A136 | A(10,21,24) | 109.2715 | -DE/DX = 0.0 | ! |
| ! A137 | A(12,21,14) | 90.0444  | -DE/DX = 0.0 | ! |
| ! A138 | A(12,21,17) | 125.9199 | -DE/DX = 0.0 | ! |
| ! A139 | A(12,21,20) | 108.3218 | -DE/DX = 0.0 | ! |
| ! A140 | A(14,21,20) | 100.3809 | -DE/DX = 0.0 | ! |
| ! A141 | A(14,21,22) | 111.6489 | -DE/DX = 0.0 | ! |
| ! A142 | A(17,21,22) | 110.9038 | -DE/DX = 0.0 | ! |
| ! A143 | A(17,21,24) | 98.563   | -DE/DX = 0.0 | ! |
| ! A144 | A(20,21,24) | 109.4591 | -DE/DX = 0.0 | ! |
| ! A145 | A(10,22,11) | 123.7017 | -DE/DX = 0.0 | ! |
| ! A146 | A(10,22,12) | 92.7959  | -DE/DX = 0.0 | ! |
| ! A147 | A(10,22,19) | 92.4203  | -DE/DX = 0.0 | ! |
| ! A148 | A(10,22,23) | 132.5609 | -DE/DX = 0.0 | ! |
| ! A149 | A(10,22,24) | 110.6427 | -DE/DX = 0.0 | ! |
| ! A150 | A(11,22,12) | 125.5627 | -DE/DX = 0.0 | ! |
| ! A151 | A(11,22,20) | 91.5466  | -DE/DX = 0.0 | ! |
| ! A152 | A(11,22,21) | 139.7736 | -DE/DX = 0.0 | ! |

|        |             |          |              |   |
|--------|-------------|----------|--------------|---|
| ! A153 | A(11,22,24) | 94.1632  | -DE/DX = 0.0 | ! |
| ! A154 | A(12,22,19) | 143.1036 | -DE/DX = 0.0 | ! |
| ! A155 | A(12,22,20) | 110.6339 | -DE/DX = 0.0 | ! |
| ! A156 | A(12,22,23) | 92.9929  | -DE/DX = 0.0 | ! |
| ! A157 | A(19,22,21) | 123.242  | -DE/DX = 0.0 | ! |
| ! A158 | A(19,22,24) | 113.7377 | -DE/DX = 0.0 | ! |
| ! A159 | A(20,22,23) | 102.6897 | -DE/DX = 0.0 | ! |
| ! A160 | A(20,22,24) | 111.6884 | -DE/DX = 0.0 | ! |
| ! A161 | A(21,22,23) | 116.9255 | -DE/DX = 0.0 | ! |
| ! A162 | A(3,23,4)   | 115.9934 | -DE/DX = 0.0 | ! |
| ! A163 | A(3,23,11)  | 122.7683 | -DE/DX = 0.0 | ! |
| ! A164 | A(3,23,19)  | 142.3977 | -DE/DX = 0.0 | ! |
| ! A165 | A(3,23,22)  | 90.4153  | -DE/DX = 0.0 | ! |
| ! A166 | A(4,23,11)  | 106.5418 | -DE/DX = 0.0 | ! |
| ! A167 | A(4,23,13)  | 87.5127  | -DE/DX = 0.0 | ! |
| ! A168 | A(4,23,22)  | 127.0675 | -DE/DX = 0.0 | ! |
| ! A169 | A(4,23,24)  | 132.2666 | -DE/DX = 0.0 | ! |
| ! A170 | A(11,23,13) | 126.6462 | -DE/DX = 0.0 | ! |
| ! A171 | A(11,23,24) | 91.8544  | -DE/DX = 0.0 | ! |
| ! A172 | A(13,23,19) | 123.4865 | -DE/DX = 0.0 | ! |
| ! A173 | A(13,23,22) | 98.859   | -DE/DX = 0.0 | ! |
| ! A174 | A(19,23,24) | 115.5377 | -DE/DX = 0.0 | ! |
| ! A175 | A(2,24,3)   | 92.7838  | -DE/DX = 0.0 | ! |
| ! A176 | A(2,24,12)  | 124.492  | -DE/DX = 0.0 | ! |
| ! A177 | A(2,24,21)  | 92.6226  | -DE/DX = 0.0 | ! |
| ! A178 | A(2,24,22)  | 128.2368 | -DE/DX = 0.0 | ! |
| ! A179 | A(2,24,23)  | 109.4877 | -DE/DX = 0.0 | ! |
| ! A180 | A(3,24,12)  | 121.3138 | -DE/DX = 0.0 | ! |
| ! A181 | A(3,24,14)  | 108.9222 | -DE/DX = 0.0 | ! |
| ! A182 | A(3,24,21)  | 126.849  | -DE/DX = 0.0 | ! |

|        |                  |          |                 |   |
|--------|------------------|----------|-----------------|---|
| ! A183 | A(3,24,22)       | 88.9621  | -DE/DX = 0.0    | ! |
| ! A184 | A(12,24,13)      | 138.9992 | -DE/DX = 0.0    | ! |
| ! A185 | A(12,24,14)      | 92.6601  | -DE/DX = 0.0    | ! |
| ! A186 | A(12,24,23)      | 91.6076  | -DE/DX = 0.0    | ! |
| ! A187 | A(13,24,21)      | 115.2698 | -DE/DX = 0.0    | ! |
| ! A188 | A(13,24,22)      | 113.225  | -DE/DX = 0.0    | ! |
| ! A189 | A(14,24,22)      | 99.5801  | -DE/DX = 0.0    | ! |
| ! A190 | A(14,24,23)      | 109.9446 | -DE/DX = 0.0    | ! |
| ! A191 | A(21,24,23)      | 100.0806 | -DE/DX = 0.0    | ! |
| ! A192 | A(4,25,15)       | 29.0483  | -DE/DX = 0.0    | ! |
| ! A193 | A(4,25,26)       | 108.793  | -DE/DX = 0.0    | ! |
| ! A194 | A(15,25,26)      | 113.3599 | -DE/DX = 0.0    | ! |
| ! A195 | A(25,26,27)      | 166.3746 | -DE/DX = 0.0    | ! |
| ! A196 | A(26,27,28)      | 120.6198 | -DE/DX = 0.0001 | ! |
| ! A197 | A(27,28,29)      | 120.794  | -DE/DX = 0.0    | ! |
| ! A198 | A(27,28,30)      | 118.1379 | -DE/DX = 0.0    | ! |
| ! A199 | A(29,28,30)      | 121.068  | -DE/DX = 0.0    | ! |
| ! A200 | L(16,15,25,3,-1) | 176.6432 | -DE/DX = 0.0    | ! |
| ! A201 | L(16,15,25,3,-2) | 199.0165 | -DE/DX = 0.0    | ! |



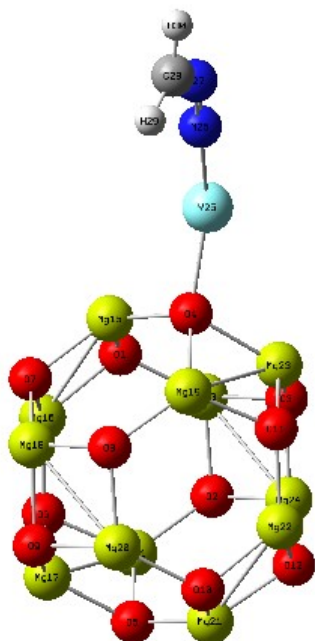

G3:M1:V1 - Gaussian Calculation Setup

Title: **CaC\_nano cage**  
Keywords: **#p opt uwb97xd/genecp pop=nbo int=ultrafine pseudo=read scf=tight**  
Charge/Mult.: **0 2**

| Job Type | Method | Title | Link 0 | General | Guess | Pop. | PBC | Solvation | Add. Inp. | Preview |
|----------|--------|-------|--------|---------|-------|------|-----|-----------|-----------|---------|
|----------|--------|-------|--------|---------|-------|------|-----|-----------|-----------|---------|

Multilayer ONIOM Model

Method: Ground State | DFT... | Unrestricted | WB97XD  
Basis Set: GENECP  
Charge: 0 | Spin: Doublet

Use sparse matrices

Additional Keywords: int=ultrafine pseudo=read scf=tight

Scheme: (Unnamed Scheme)

Buttons: Submit... Quick Launch Cancel Edit... Retain Defaults

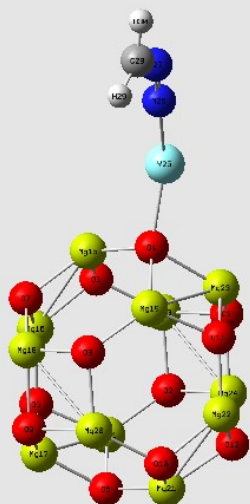

G4:M1:V1 - Gaussian Calculation Setup

Title: **CaC\_nano cage**  
Keywords: **#p opt uwb97xd/genecp pop=nbo int=ultrafine pseudo=read scf=tight**  
Charge/Mult.: **0 2**

| Job Type | Method | Title | Link 0 | General | Guess | Pop. | PBC | Solvation | Add. Inp. | Preview |
|----------|--------|-------|--------|---------|-------|------|-----|-----------|-----------|---------|
|----------|--------|-------|--------|---------|-------|------|-----|-----------|-----------|---------|

```
Mg,O,C,N,H 0  
6-311+G(d,p)  
****  
Y 0  
SDD  
****  
  
Y 0  
SDD
```

Write Additional Input

Additional Keywords: int=ultrafine pseudo=read scf=tight

Scheme: (Unnamed Scheme)

Buttons: Help Update Assign to Molecule Group

**Figure 2:** Pictorial projection of the computational methods used.
